# Supplementary material for: Analysis of prodromal symptoms and need for short-term prophylaxis in angioedema patients under long-term prophylaxis
Source: Orphanet J Rare Dis. 2025 Feb 1;20:47. doi: 10.1186/s13023-025-03562-1 (PMC11786469; doi:10.1186/s13023-025-03562-1)
Supplement: Supplementary file 1 — Supplementary Material 1 [file 13023_2025_3562_MOESM1_ESM.pdf]

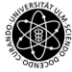

universität  
**uulm**

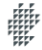

DIE DEUTSCHEN  
UNIVERSITÄTSKLINIKA®

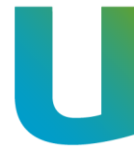

UNIVERSITÄTS  
KLINIKUM  
ulm

Universitätsklinikum Ulm – HNO-Klinik - 89070 Ulm

**Universitätsklinik und  
Hochschulambulanz für  
Hals-Nasen-Ohren-Heilkunde,  
Kopf- und Hals-Chirurgie  
Frauensteige 12, D-89075 Ulm**

**Ärztlicher Direktor**  
**Prof. Dr. T. Hoffmann**  
Frauensteige 12  
D-89075 Ulm

**Sekretariat**  
Marion Reith, Brigitta Clases  
ent.department@uniklinik-ulm.de  
T: 0731 500-59501 / 03  
F: 0731 500-59502

**Sektion für  
Phoniatrie/Pädaudiologie**  
Leiterin: Frau Prof. Dr. A.-K. Rohlf's  
T: 0731 500-59701  
F: 0731 500-59702

## Fragebogen für Patienten mit hereditärem Angioödem (HAE) unter Langzeitprophylaxe

Thema: Eine Fragebogen-gestützte Analyse von Prodromalsymptomen und der Notwendigkeit einer  
Kurzzeitprophylaxe bei Patienten mit hereditärem Angioödem unter Langzeitprophylaxe.

Geschlecht:

Geburtsjahr:

1. Wann sind bei Ihnen die ersten Symptome des Angioödems aufgetreten?

.....  
.....

2. Wann wurde die Diagnose „hereditäres Angioödem“ bei Ihnen gestellt?

.....  
.....

3. Seit wann nehmen Sie eine Langzeitprophylaxe ein? (Jahreszahl)

.....

4. Welches Medikament nehmen Sie für die Langzeitprophylaxe ein?

- ☐ Lanadelumab (Takhzyro) alle 2 Wochen 300mg
- ☐ Lanadelumab (Takhzyro) alle 4 Wochen 300mg
- ☐ Lanadelumab (Takhzyro) alle \_\_\_\_\_ Wochen 300mg
- ☐ Berinert alle 2-3 Tage nach Gewicht dosiert
- ☐ Cinryze alle 2-3 Tage nach Gewicht dosiert
- ☐ Orladeyo 150 mg einmal täglich
- ☐ Sonstiges: .....

5. Was war die Hauptursache für den Einsatz der Langzeitprophylaxe?  
(Mehrfachnennungen möglich!)

- ☐ Häufige Schwellungen
- ☐ Sehr starke Schmerzen bei den Schwellungen
- ☐ Gefährliche Schwellungen (z.B. im Kehlkopf)
- ☐ Viele Fehltage bei der Arbeit/Schule
- ☐ Starke Einschränkung und Belastung durch das HAE im Alltag
- ☐ Sorge, dass Attacken unvorhergesehen auftreten könnten
- ☐ Sonstiges: .....

.....

6. Welche Faktoren lösen bei Ihnen Schwellungen aus?

- ☐ Stress (positiver und negativer Art)
- ☐ Temperaturänderungen
- ☐ Hormonelle Faktoren (z.B. Menstruation)
- ☐ Mechanische Reize (z.B. Verletzungen)
- ☐ Infekte (Schnupfen, Erkrankungen)
- ☐ Sonstiges: .....

.....

7. Hatten Sie Schwellungen / Bauchschmerzattacken seit Einnahme der Langzeitprophylaxe?

➔ Bitte aufzählen soweit möglich

| Datum | Möglicher Auslöser<br>(z.B. Erkältung) | Ort der Schwellung<br>(z.B. Arm,<br>Bauchkrämpfe) | Intensität der<br>Schwellung (mild,<br>moderat, schwer) |
|-------|----------------------------------------|---------------------------------------------------|---------------------------------------------------------|
|       |                                        |                                                   |                                                         |
|       |                                        |                                                   |                                                         |
|       |                                        |                                                   |                                                         |
|       |                                        |                                                   |                                                         |
|       |                                        |                                                   |                                                         |
|       |                                        |                                                   |                                                         |
|       |                                        |                                                   |                                                         |
|       |                                        |                                                   |                                                         |
|       |                                        |                                                   |                                                         |

8. Welches Medikament nehmen Sie aktuell zur Akutbehandlung einer Durchbruchattacke?

- ☐ Icatibant 30 mg subkutan  
☐ Berinert gewichtsadaptiert intravenös  
☐ Sonstiges: .....  
 .....

9. Hatten Sie seit Einnahme der Langzeitprophylaxe eine Operation? Wenn ja: welche und wann? Falls mehrere durchgeführt wurden, diese bitte einzeln aufzählen.

.....  
 .....  
 .....  
 .....

10. Wenn Frage 8 mit **ja** beantwortet wurde: hatten Sie vor der Operation ein weiteres Medikament („Kurzzeitprophylaxe“) zusätzlich eingenommen? Wenn ja: welches? (z.B. Berinert i.v. nach Körpergewicht). Falls mehrere durchgeführt wurden, diese bitte einzeln aufzählen.

.....

.....

.....

.....

11. Wenn Frage 8 mit **ja** beantwortet wurde: trat nach der durchgeführten Operation eine Schwellung / Bauchkrämpfe auf? Wenn ja, wo war sie, wie stark war sie (mild, moderat oder schwer) und wurde diese behandelt? Falls mehrere durchgeführt wurden, diese bitte einzeln aufzählen.

.....

.....

.....

.....

12. Hatten Sie seit Einnahme der Langzeitprophylaxe einen zahnärztlichen „Eingriff“? Wenn ja was? (Bitte auch professionelle Zahnreinigung angeben). Falls mehrere durchgeführt wurden, diese bitte einzeln aufzählen.

.....

.....

.....

.....

13. Wenn Frage 11 mit **ja** beantwortet wurde: hatten Sie vor dem Eingriff ein weiteres Medikament („Kurzzeitprophylaxe“) zusätzlich eingenommen? Wenn ja: welches? (z.B. Berinert i.v. nach Körpergewicht). Falls mehrere durchgeführt wurden, diese bitte einzeln aufzählen.

.....

.....

.....

.....

14. Wenn Frage 11 mit **ja** beantwortet wurde: trat nach dem durchgeführten zahnärztlichen Eingriff eine Schwellung / Bauchkrämpfe auf? Wenn ja, wo war sie, wie stark war sie (mild, moderat oder schwer) und wurde diese behandelt? Falls mehrere durchgeführt wurden, diese bitte einzeln aufzählen.

.....

.....

.....

.....

15. Hatten Sie seit Einnahme der Langzeitprophylaxe eine Magen- oder Darmspiegelung? Wenn ja was? Falls mehrere durchgeführt wurden, diese bitte einzeln aufzählen.

.....

.....

.....

.....

16. Wenn Frage 15 mit **ja** beantwortet wurde: hatten Sie vor dem Eingriff ein weiteres Medikament („Kurzzeitprophylaxe“) zusätzlich eingenommen? Wenn ja: welches? (z.B. Berinert i.v. nach Körpergewicht) Falls mehrere durchgeführt wurden, diese bitte einzeln aufzählen.

.....

.....

.....

.....

17. Wenn Frage 15 mit **ja** beantwortet wurde: trat nach der durchgeführten Spiegelung eine Schwellung / Bauchkrämpfe auf? Wenn ja, wo war sie, wie stark war sie (mild, moderat oder schwer) und wurde diese behandelt? Falls mehrere durchgeführt wurden, diese bitte einzeln aufzählen.

.....

.....

.....

.....

18. Kam es bei Ihnen seit Einnahme der Langzeitprophylaxe zu einem anderen Ereignis, das bei Ihnen Schwellungen auslöst? (z.B. Krankheit, Infektion, Reise etc.)? Wenn ja, bitte auflisten.

.....  
.....  
.....  
.....

19. Bitte Charakterisieren Sie die Schwellungen nach den in Frage 18 gelisteten Ereignissen. Wo waren sie, wie stark waren sie (mild, moderat oder schwer) und wurden diese behandelt?

.....  
.....  
.....  
.....

20. Gab es vor dem Beginn der Langzeitprophylaxe Symptome, welche einer Schwellungsattacke vorausgingen (z.B. ausgeprägte Müdigkeit, Stimmungsänderungen, Kribbeln, Übelkeit, etc.)? Wenn ja, listen Sie diese bitte auf:

.....  
.....  
.....  
.....

21. Wie haben Sie reagiert, wenn diese Symptome aufgetreten sind (z.B. abgewartet, die Bedarfsmedikation gegeben, körperliche Schonung, etc.)?

.....  
.....  
.....  
.....

22. Haben Sie nach Einleitung der Langzeitprophylaxe weiterhin diese Symptome? Wenn ja, welche?

.....  
.....  
.....  
.....

23. Folgt den diesen Symptomen weiterhin Schwellungen/Bauchschmerzattacken? Wenn mehrere Symptome angegeben wurden, diese bitte einzeln listen:

.....  
.....  
.....  
.....

24. Haben sich diese Symptome in ihrer Art, Häufigkeit, Intensität o.Ä. seit Durchführung der Langzeitprophylaxe geändert? Wenn ja, wie?

.....  
.....  
.....  
.....

25. Wie reagieren Sie inzwischen unter der Langzeitprophylaxe, wenn diese Symptome auftreten (z.B. abwarten, die Bedarfsmedikation geben, körperliche Schonung, etc.)?

.....  
.....  
.....  
.....

26. Hatten Sie allgemein schon einmal einen rötlichen Hautausschlag, ggf. vor einer Schwellung? („Erythema marginatum“)

.....  
.....  
.....  
.....

27. Hatten Sie seit Einnahme der Langzeitprophylaxe schon einmal einen rötlichen Hautausschlag, ggf. vor einer Schwellung? („Erythema marginatum“)

.....  
.....  
.....  
.....

28. Worin sehen Sie selbst den größten Vorteil der Langzeitprophylaxe?

.....

.....

.....

.....

29. Gibt es etwas, was Ihrer Meinung nach bei der Langzeitprophylaxe besser sein könnte?

.....

.....

.....

.....

Vielen Dank für das Beantworten der Fragen!

Ihr Angioödem-Team der HNO-Universitätsklinik Ulm
